# Supplementary material for: High-throughput discovery of rare insertions and deletions in large cohorts
Source: HighWire-hosted journal article supplement (doi:10.1101/gr.109157.110), 2010-11-01

# Supplementary Figure I

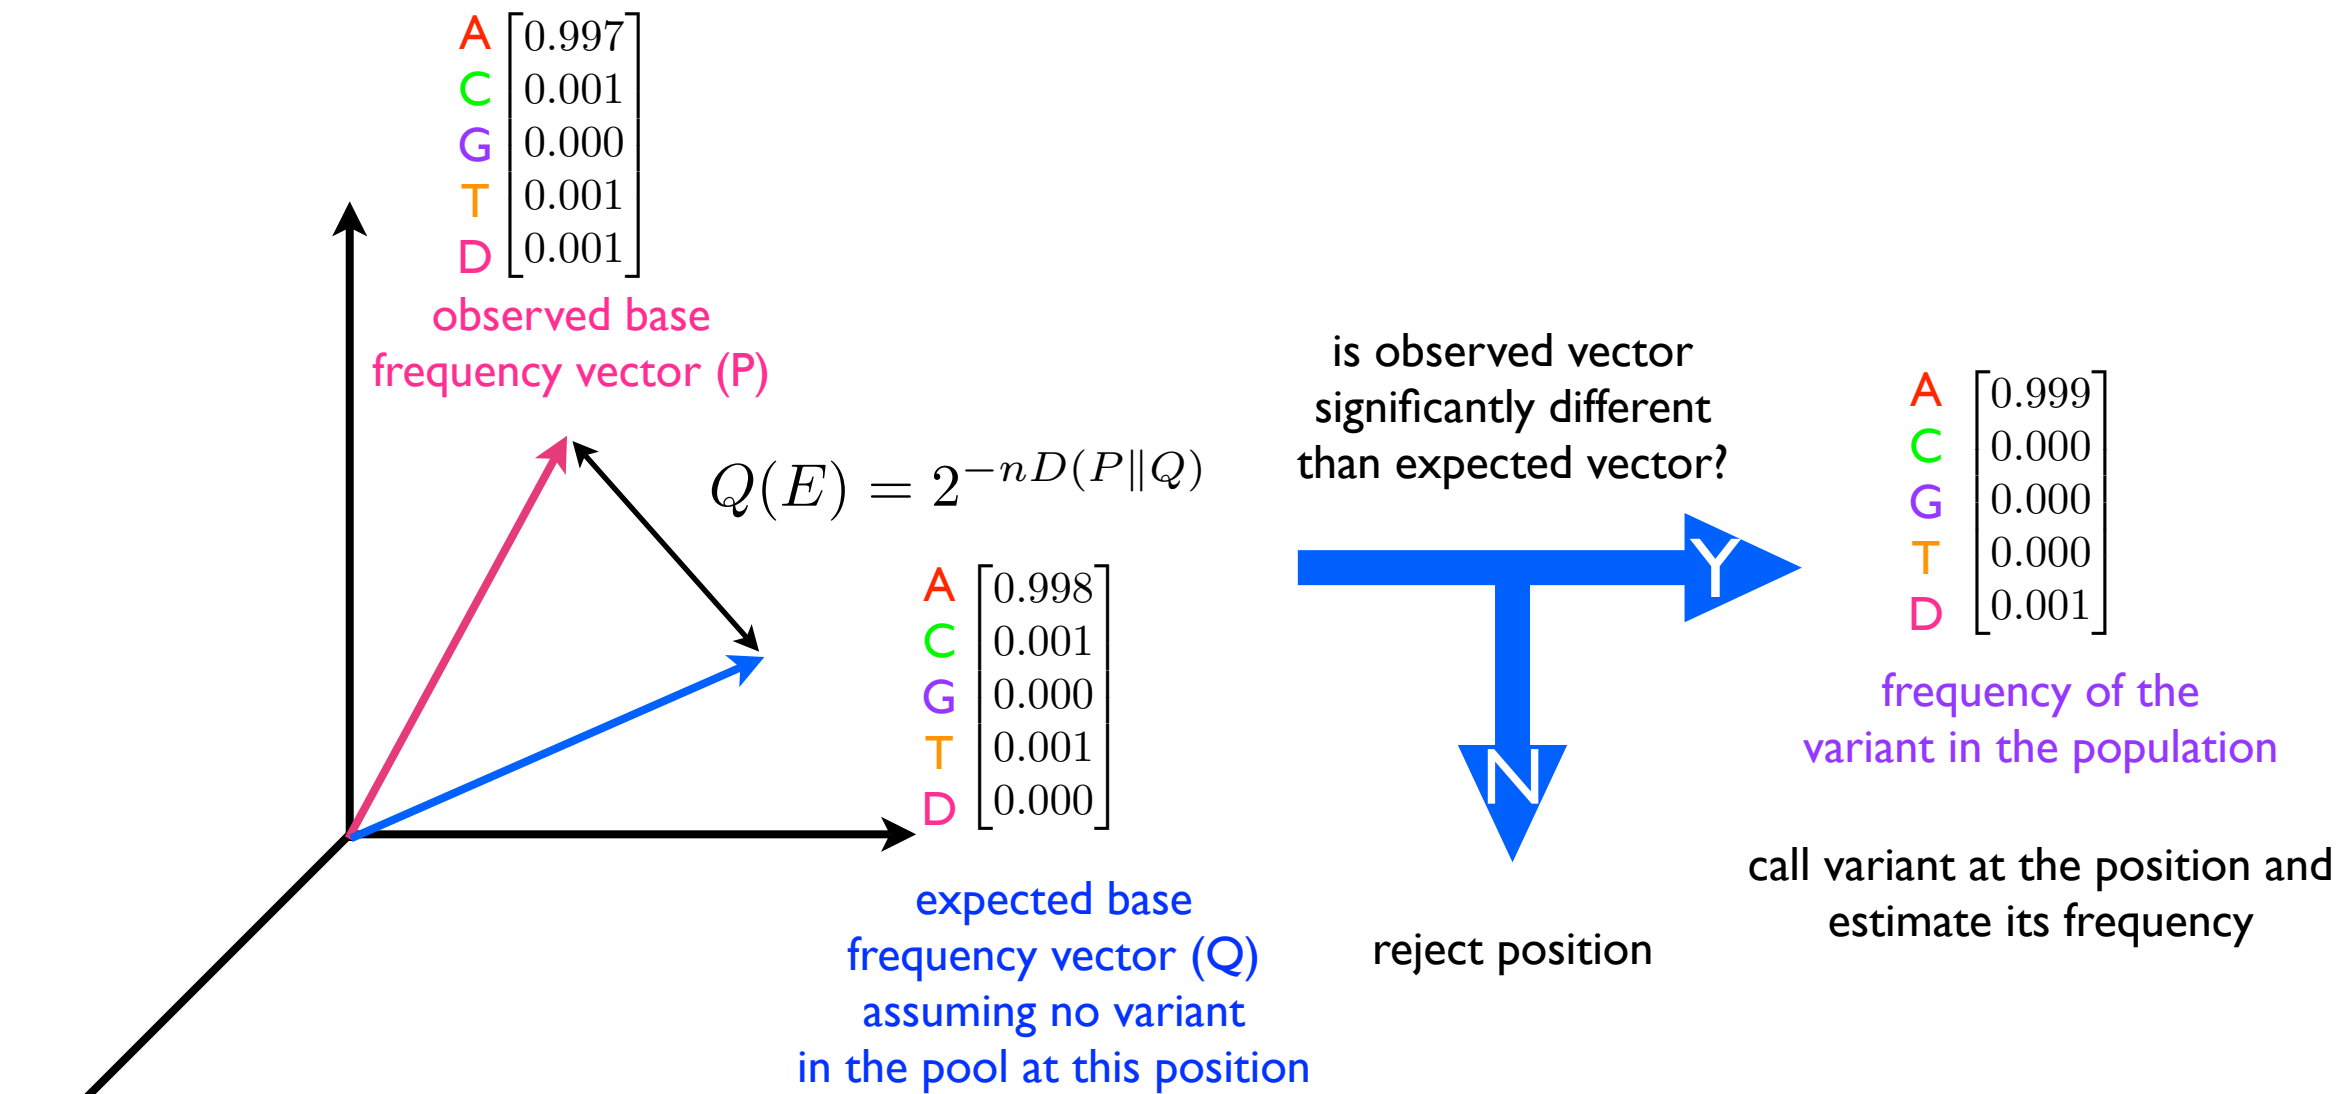

# Supplementary Figure 2

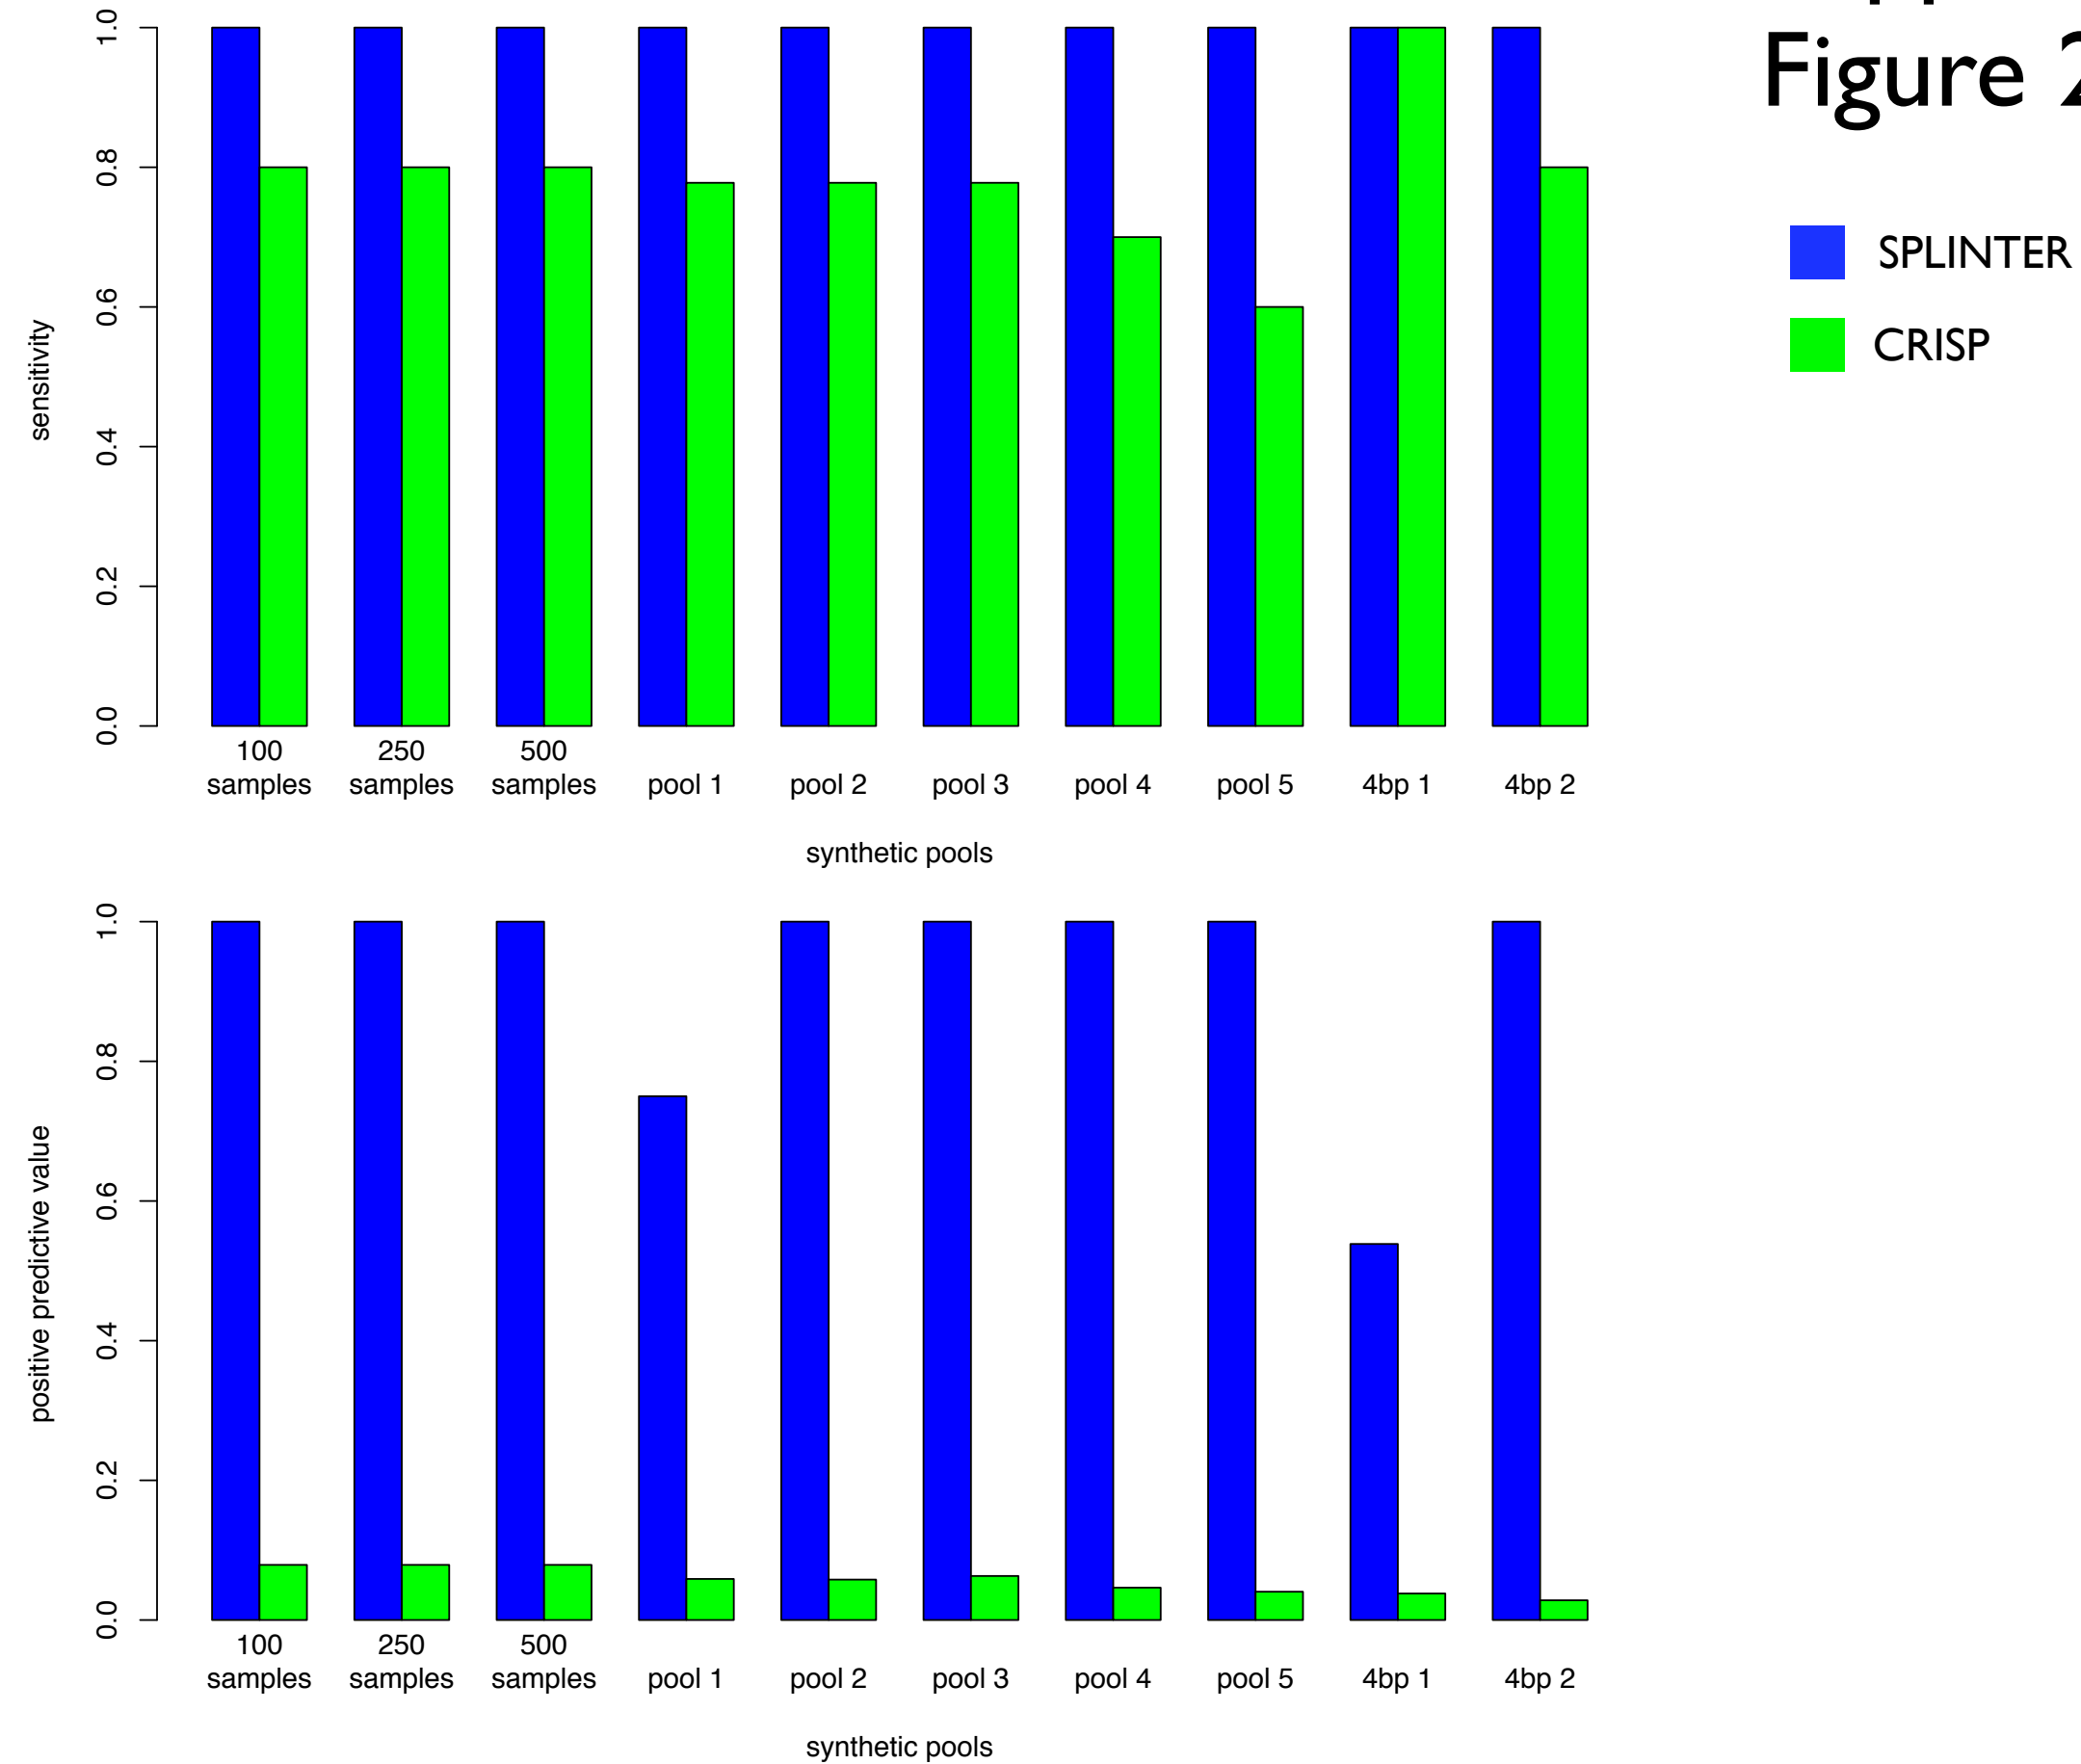

# Supplementary Figure 3

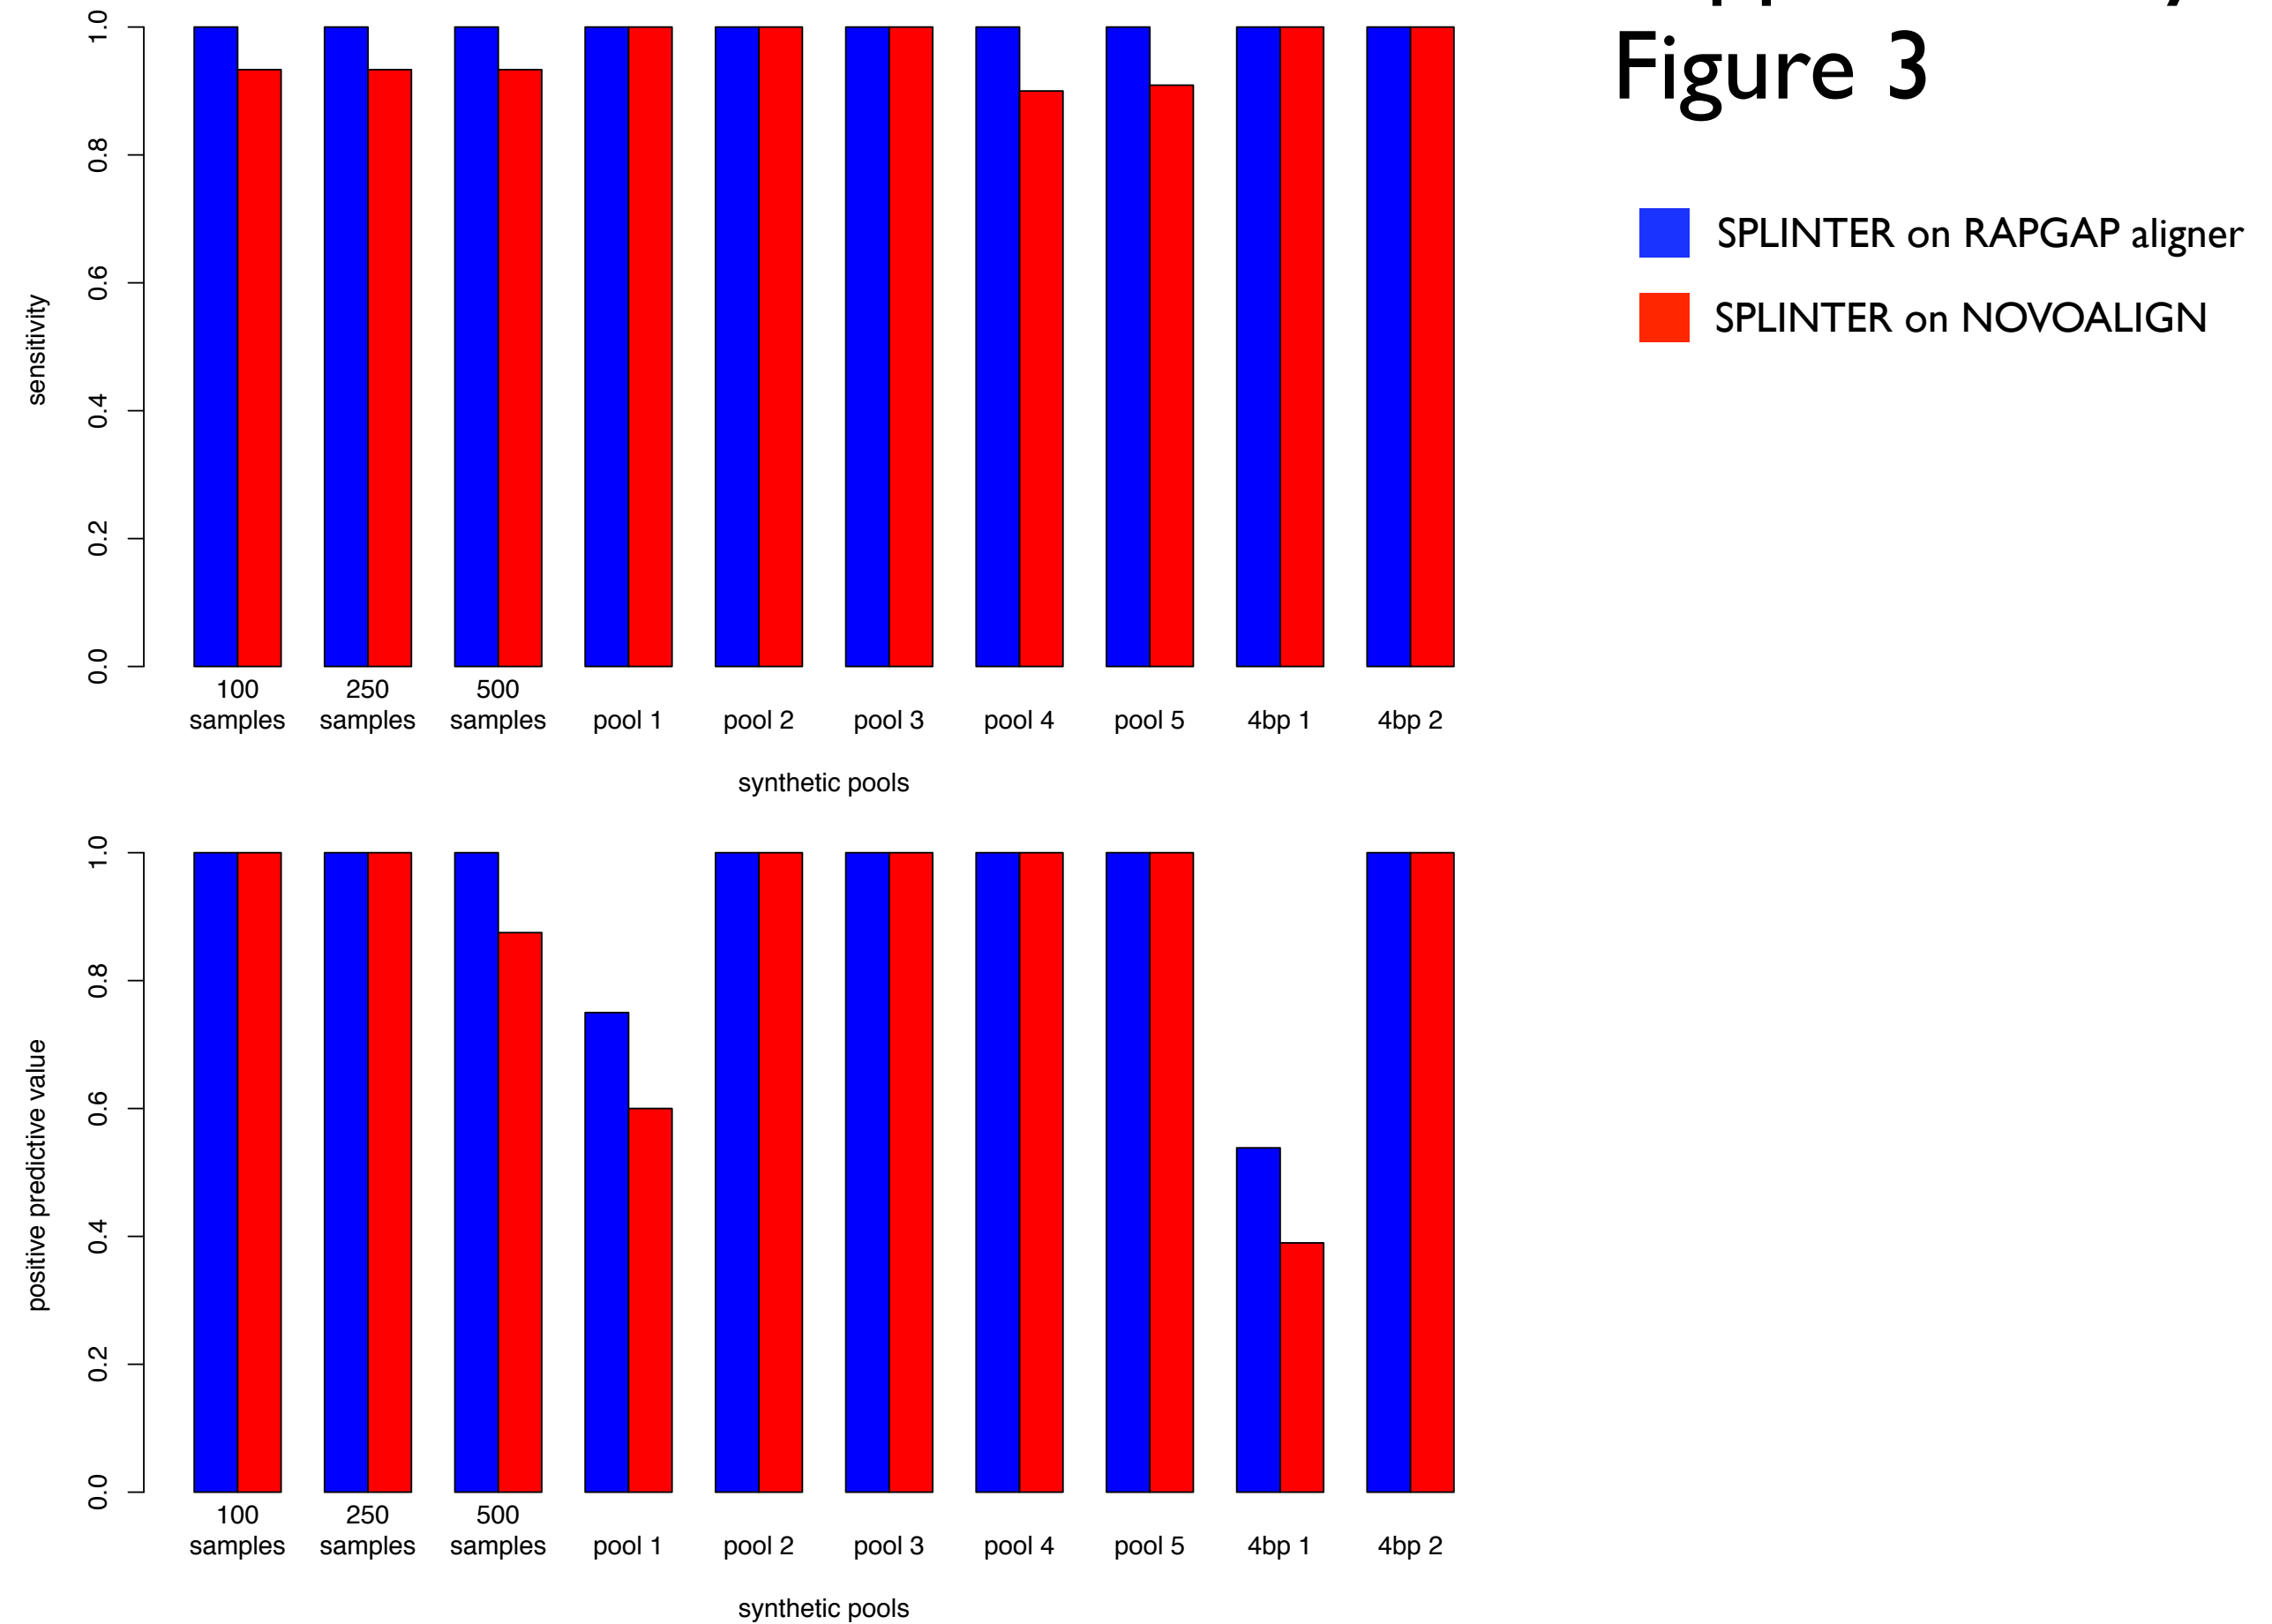

# Supplementary Figure 4

a

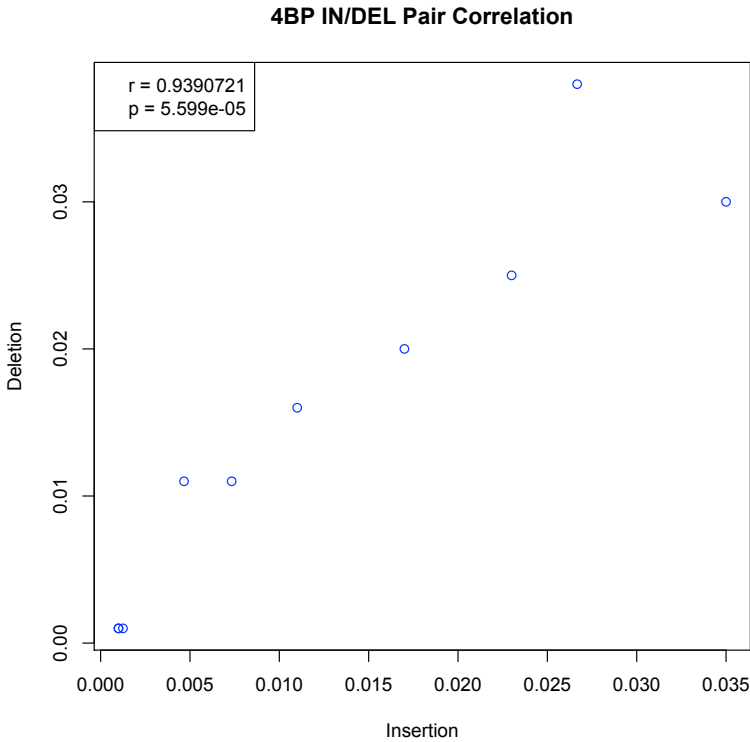

b

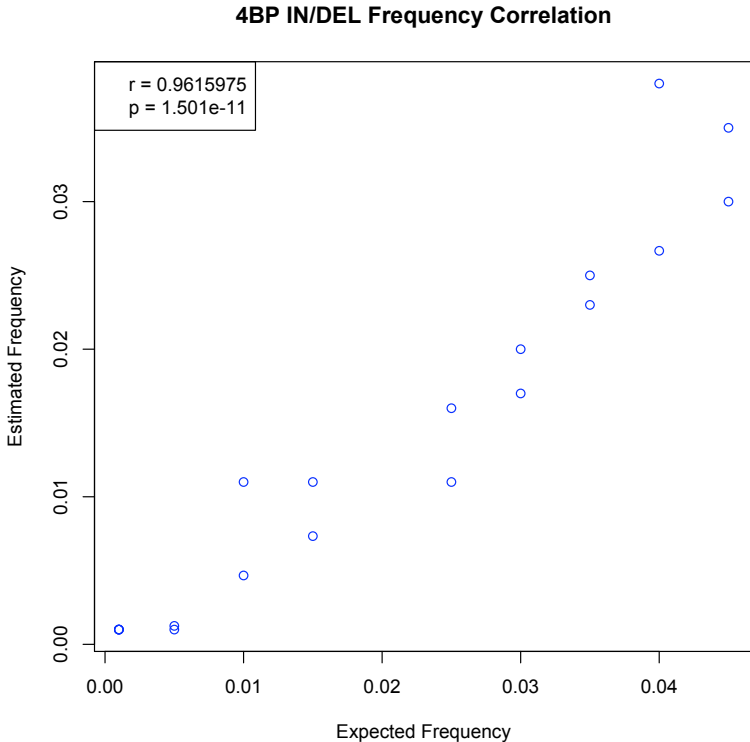

# Supplementary Figure 5

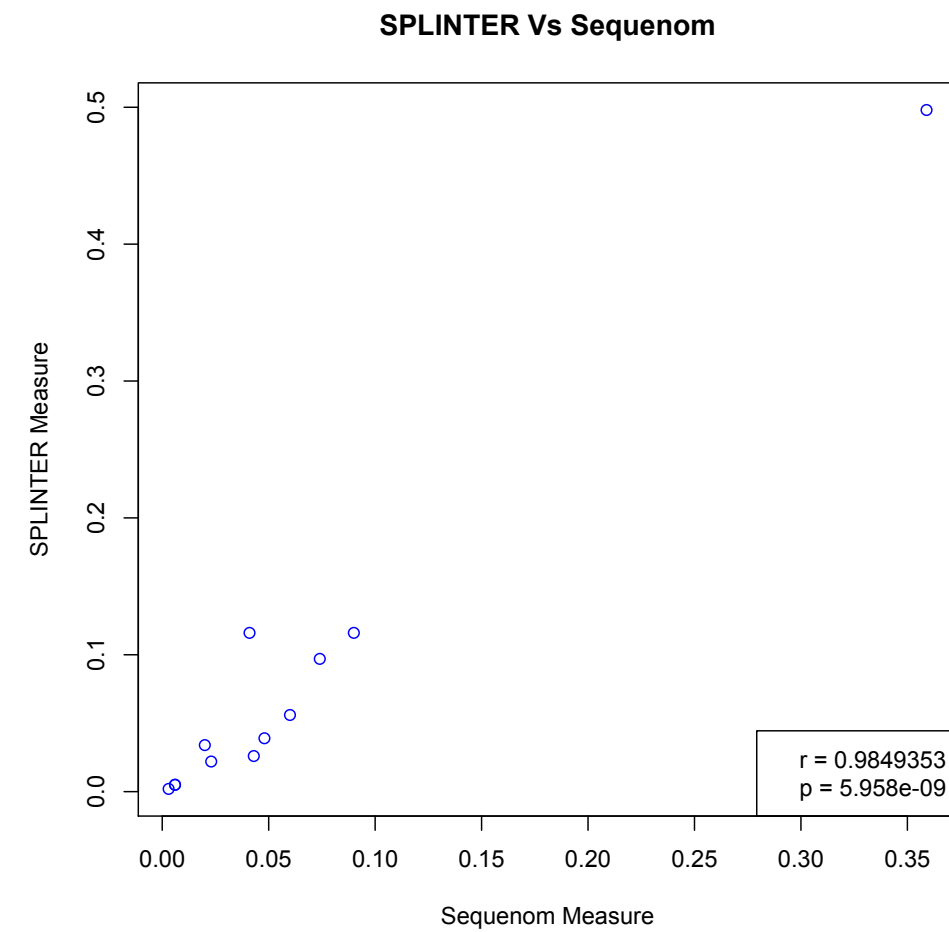

Supplement: Supp_Figures.pdf [file Supp_Figures.pdf]
